# Supplementary material
Source: PubMed Central journal article supplement (PMC7324502)
Supplement: supp_RA120.013833_160087_1_supp_523359_q9wvwl.pdf [file supp_RA120.013833_160087_1_supp_523359_q9wvwl.pdf]

Supporting Information

**Polyamines Regulate Gene Expression by Stimulating Translation of Histone  
Acetyltransferase mRNAs**

Akihiko Sakamoto<sup>‡</sup>, Yusuke Terui<sup>‡</sup>, Takeshi Uemura<sup>§</sup>, Kazuei Igarashi<sup>§¶</sup>,  
and Keiko Kashiwagi<sup>‡</sup><sup>1</sup>

Table S1. Primers used in this study.

Fig. S1. Protein levels of various transcription factors.

**Table S1 Primers used in this study.**

| No. | Primer used           | Nucleotide sequence                                 |
|-----|-----------------------|-----------------------------------------------------|
| P1  | 5'-Gcn5 (RT)          | 5'-GAAGCTTGAGAACTAGGGGTCTTCTCAGC-3'                 |
| P2  | 3'-Gcn5 (RT)          | 5'-GGTGTCTGTGTCCTCTTCCTTGTGAACAGA-3'                |
| P3  | 5'-Hat11 (RT)         | 5'-ACACAGCAATCGAGCTGAAACTAGTTCGTT-3'                |
| P4  | 3'-Hat1 (RT)          | 5'-TTGCCTTCAACATCATCTGCCTCCACACAA-3'                |
| P5  | 5'- $\beta$ -actin    | 5'-CAGGTCATCACTATTGGCAACGAGCGGTTC-3'                |
| P6  | 3'- $\beta$ -actin    | 5'-GGAGCCAGAGCAGTAATCTCCTTCTGCATC-3'                |
| P7  | 5'-Ki-67              | 5'-TCAAGGCGAGCCTCAAGAGATAGCTTCTGT-3'                |
| P8  | 3'-Ki-67              | 5'-CAGAAGTGGGCTCTACTATGTTTCTGCCAG-3'                |
| P9  | 5'-Lyar               | 5'-GAAGTACGGAGGCAAAGGCTATGAAGCCAA-3'                |
| P10 | 3'-Lyar               | 5'-TTCGGAGAAGATATCCCACACCTGCTCTAG-3'                |
| P11 | 5'-Pena               | 5'-GGACTTAGATGTGGAGCAACTTGAATCCC-3'                 |
| P12 | 3'-Pena               | 5'-CAGGTACCTCAGAGCAAACGTTAGGTGAAC-3'                |
| P13 | 5'-MCM-2              | 5'-GGATGGAGAGGAACTCATTGGTGATGGCAT-3'                |
| P14 | 3'-MCM-2              | 5'-GCTGTCAGCTCCTCCACATCTTCATCATCC-3'                |
| P15 | 5'-RPL30              | 5'-CTGGAGTCGATCAACTCTAGGCTCCAATT-3'                 |
| P16 | 3'-RPL30              | 5'-ACCTGGGTCAATGATAGCCAGTGTGCATAC-3'                |
| P17 | 5'-Ki-67 P            | 5'-TCGCAGCCTGGCCCCACCTCTGGACTT-3'                   |
| P18 | 3'-Ki-67 P            | 5'-TACCGACCACGGCCACCCGCGGCCTTCGCT-3'                |
| P19 | 5'-Lyar P             | 5'-AGCCCCATCACACAGCGCTGCGA-3'                       |
| P20 | 3'-Lyar P             | 5'-AGACGGAAGTGACGGCGGCGGAA-3'                       |
| P21 | 5'-Pena P             | 5'-CTTGGTATCTTCTTTGGAGAAGCGTTCACG-3'                |
| P22 | 3'-Pena P             | 5'-GCGCCACGGAAGTGGAAGTCACAGGCAAAT-3'                |
| P23 | 5'-MCM-2 P            | 5'-GCCATACCGACACTTAGATACCTAGGTCAC-3'                |
| P24 | 3'-MCM-2 P            | 5'-TAGAATGTTTGGGCACGCCACACCAGAAA-3'                 |
| P25 | 5'-Gcn5 (EcoRI)       | 5'-TATAGAATTCGCGCCGGTTGCCCATGCGGC-3'                |
| P26 | 3'-Gcn5 (BamHI)       | 5'-TAATTGGATCCCCCCCCTTCTACCCCGG-3'                  |
| P27 | 5'-Gcn5 (delta-55-63) | 5'-ATTATAAGAATTCGCCCATGCGGCCCTAGG-3'                |
| P28 | 5'-Gcn5 (delta-21-54) | 5'-CTTCGAATTCGCGCCGGTTGCTCCGCTGCG-3'                |
| P29 | 3'-Gcn5 (delta-21-54) | 5'-CGCAGCGGAGCAACCGGCGGAATTCGAAG-3'                 |
| P30 | 5'-Gcn5 (delta-6-24)  | 5'-CTGGGAGCGCGGAGGCCATGGCGGAACCTT-3'                |
| P31 | 3'-Gcn5 (delta-6-24)  | 5'-AAGGTTCCGCCATGGCCTCCGCGCTCCCAG-3'                |
| P32 | 5'-Gcn5 (NC-miR)      | 5'-TGCGGCCCTACGGAAGTCAGCCCTTCGGCGCTCCGCTGCGGGGGA-3' |

P33 3'-Gcn5 (NC-miR)  
5'-TCCCCCGCAGCGGAGCGCCGAAGGGCTGACTTCCGTAGGGCCGCA-3'

P34 5'-Gcn5 (C-miR)  
5'-TGCGGCCCTAGCGCTGAGCCCGGAACGCGCCTCCGCTGCGGGGGA-3'

P35 3'-Gcn5 (C-miR)  
5'-TCCCCCGCAGCGGAGGCGCGTTCGGGCTCAGCGCTAGGGCCGCA-3'

P36 5'-Hat1 (EcoRI) 5'-ATGAATTCTTTGTCCTTCCTCAGCTGCGGG-3'

P37 3'-Hat1 (BamHI) 5'-CGAACTGGATCCAGCTCGATTGCTGTGTTG-3'

P38 5'-Hat1 (delta-28-38) 5'-ATTATGAATTCTCAGCTGCGGGCGCTCGGA-3'

P39 5'-Hat1 (delta-2-30) 5'-ACGAATTCTTTGTCCTAATGGCGGCCTT-3'

P40 3'-Hat1 (delta-2-30) 5'-CTCCAAGGCCGCCATTAGGACAAAGAATTC-3'

P41 5'-pEGFP (seq) 5'-GGACTTTCATAATGTTCGTAACAACCTCCGC-3'

---

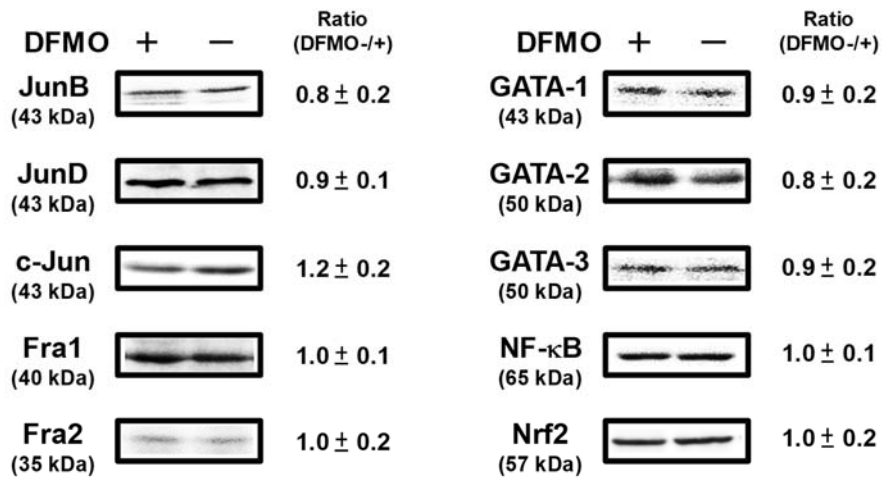

Fig. S1. **Protein levels of various transcription factors.** FM3A cells were cultured in the presence and absence of 50  $\mu$ M DFMO, cell lysate was prepared, and protein levels of various transcription factors were examined by Western blotting. Antibodies against JunB and GATA-1 were purchased from Cell Signaling Technology, those against JunD, Fra1 and Fra2 were from Abcam, and those against c-Jun, GATA-2, GATA-3, NF- $\kappa$ B and Nrf2 were from SANTA Cruz Biotechnology. Values are means  $\pm$  S.E. of triplicate determinations.
